# Supplementary material for: Dietary Hydroxytyrosol Supplementation on Growth Performance, Gut Morphometry, and Oxidative and Inflammatory Status in LPS-Challenged Broilers
Source: MDPI journal article supplement (doi:10.3390/ani14060871), 2024-03-12
Supplement: s1 [file s1]

**Figure S1.** Images of jejunum to illustrate the effects of hydroxytyrosol supplementation on the morphology, collected from broiler chickens at 20 days old, challenged or not by LPS.

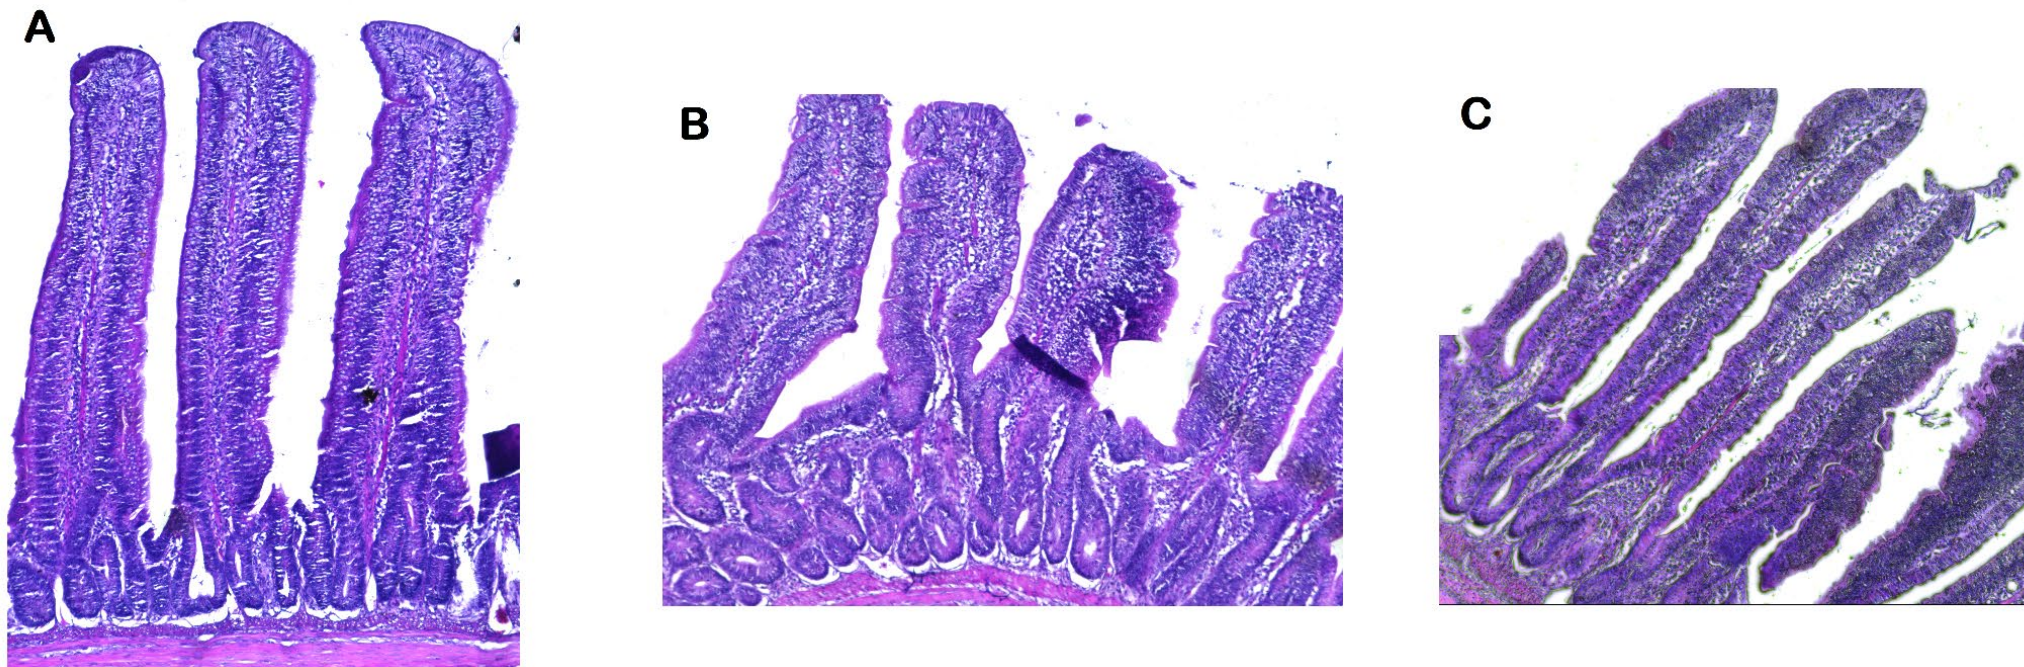

A: control diet without LPS administration; B: control diet with LPS administration; C: control diet supplemented with 10 mg of hydroxytyrosol/kg of feed with LPS administration.
